# Supplementary material for: Micro-segmented flow and multisensor-technology for microbial activity profiling
Source: Royal Society of Chemistry journal article supplement (doi:10.1039/c4em00255e), 2014-07-23
Supplement: c4em00255e1.pdf [file c4em00255e1.pdf]

### Figure S1

**Data synchronization:** Data from a multisensor-measurement after cultivation of soil sample G 9 for 9 days with 0.3 mM copper sulfate **(A)** selected unsynchronized data **(B)** same data time-based synchronized **(C)** false detection of the second segment of this segment sequence due to an extinction signal (505 nm) which corresponds to the extinction of the carrier liquid

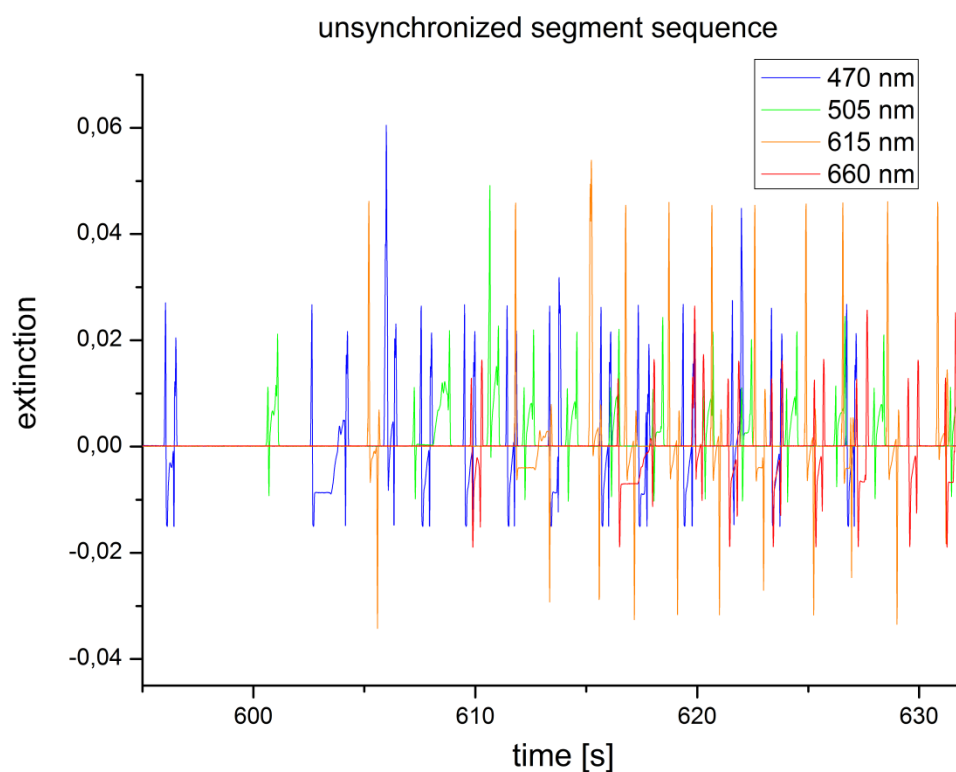

(A)

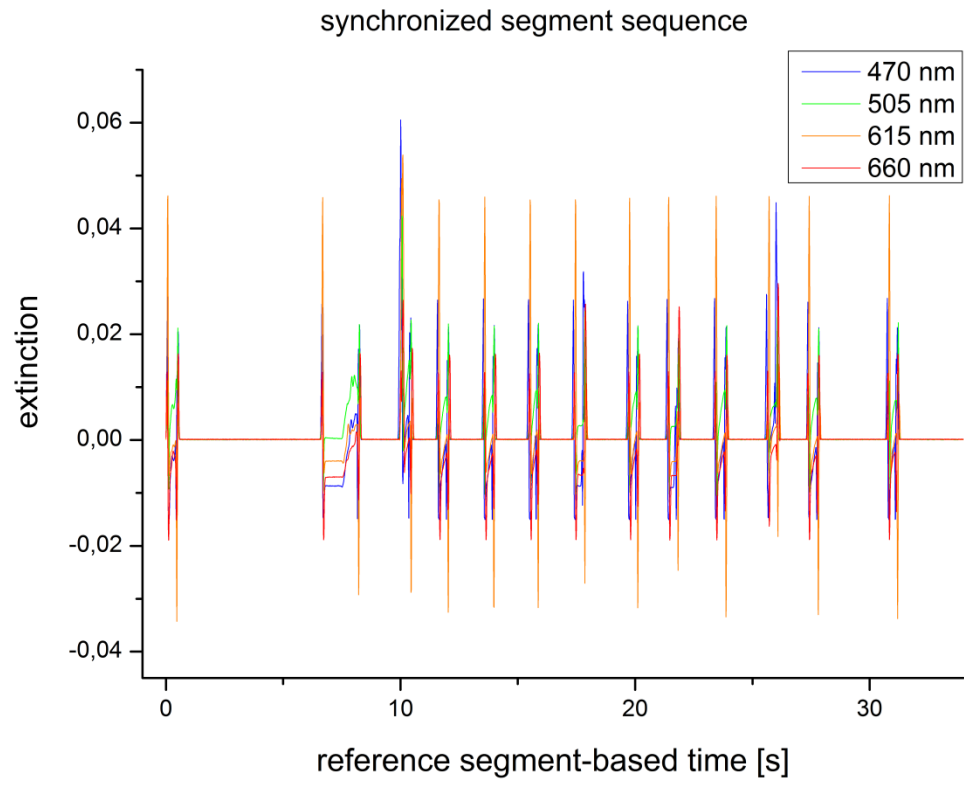

(B)

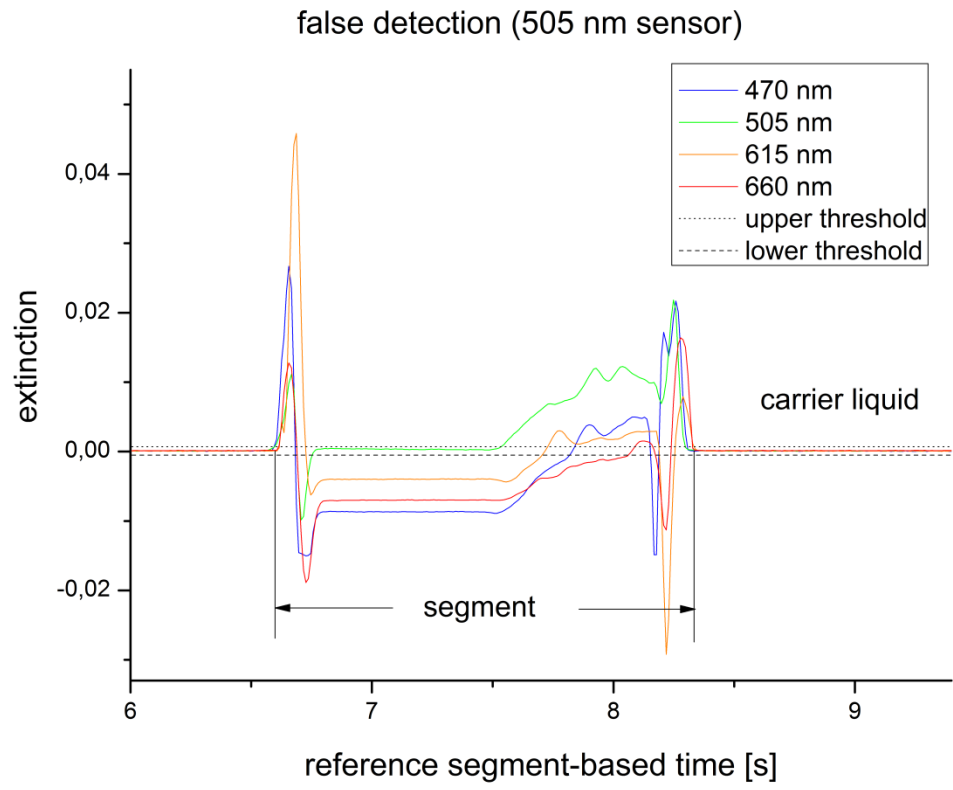

(c)
